# Supplementary material for: Insights into supramolecular-interaction-regulated piezochromic carbonized polymer dots
Source: Royal Society of Chemistry journal article supplement (doi:10.1039/c9nr00075e), 2019-01-01
Supplement: c9nr00075e1.pdf [file c9nr00075e1.pdf]

## Supplementary Information

### Insights into supramolecular-interaction-regulated piezochromic carbonized polymer dots

Ting Geng,<sup># a</sup> Tanglue Feng,<sup># b</sup> Zhiwei Ma,<sup>a</sup> Ye Cao,<sup>a</sup> Yaping Chen,<sup>a</sup> Songyuan Tao,<sup>b</sup> Guanjun Xiao,<sup>\*a</sup>  
Siyu Lu,<sup>\*c</sup> Bai Yang,<sup>b</sup> and Bo Zou<sup>a</sup>

<sup>#</sup> These authors contributed equally to this work.

Corresponding Author: [xguanjun@jlu.edu.cn](mailto:xguanjun@jlu.edu.cn); [sylu2013@zzu.edu.cn](mailto:sylu2013@zzu.edu.cn).

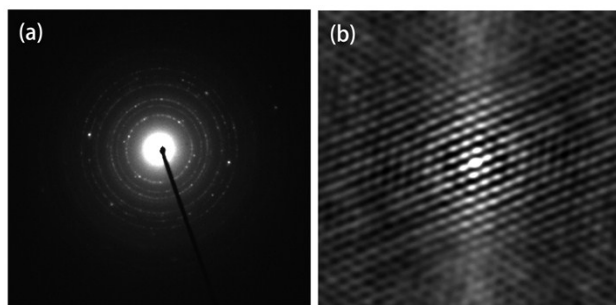

**Fig. S1** (a) Selected area electron diffraction (SEAD) of CPDs-1, (b) High-resolution transmission electron micrograph (HR-TEM) of CPDs-1.

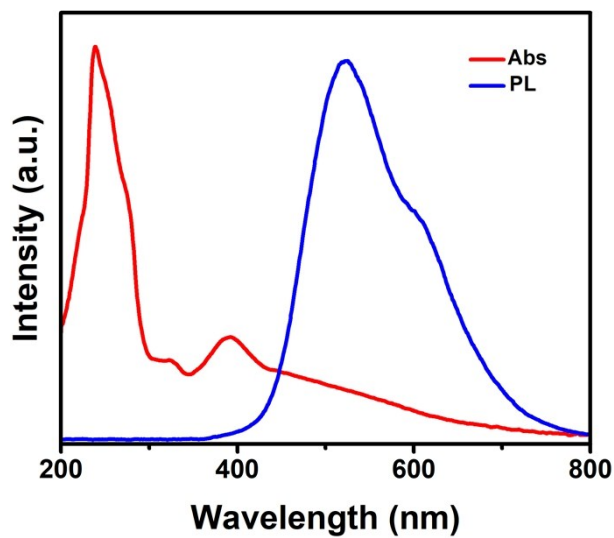

**Fig. S2** The absorption and PL spectra of CPDs-1 under ordinary pressure.

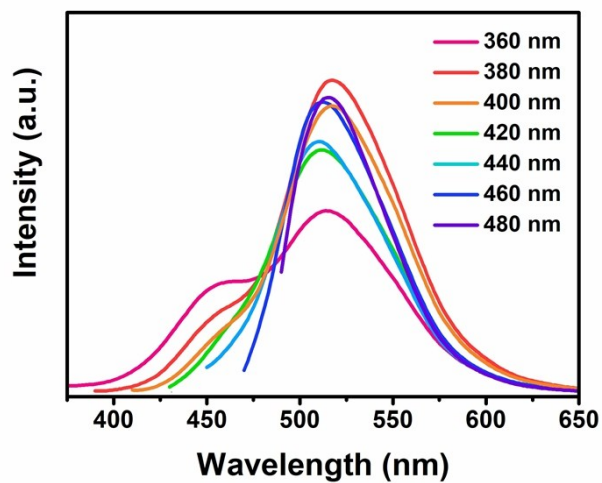

**Fig. S3** The PL spectra of CPDs-1 under different excitation wavelengths under ordinary pressure.

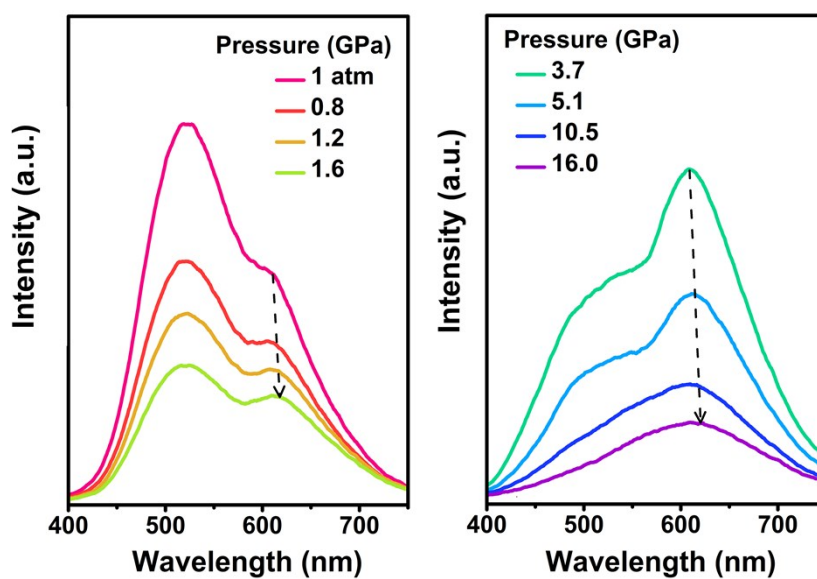

**Fig. S4** PL spectra changes of CPDs-1 under high pressure.

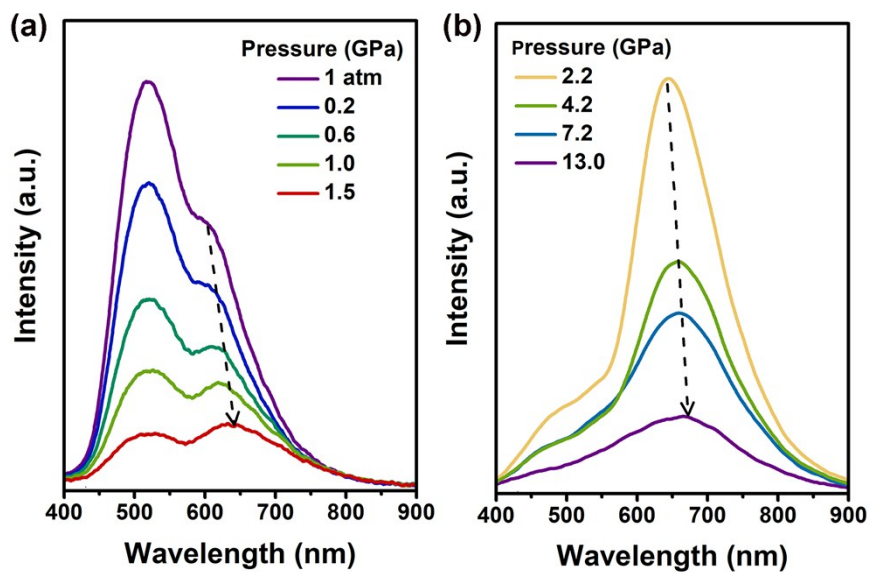

**Fig. S5** PL spectra changes of CPDs-1 under high pressure.

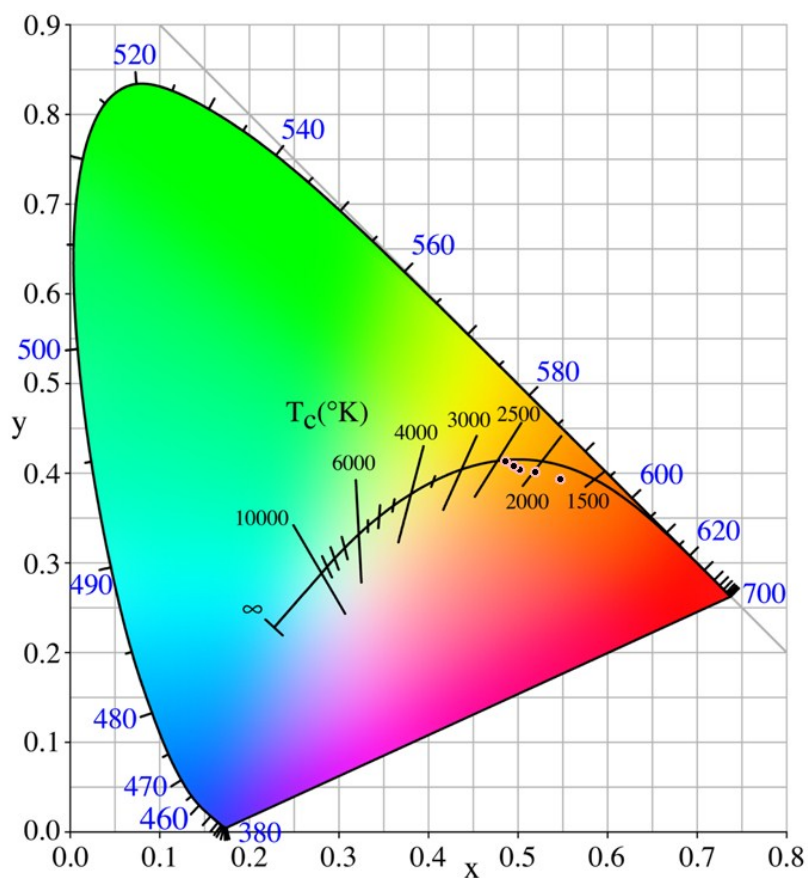

**Fig. S6** Pressure-dependent chromaticity coordinates (CIE) of solid CPDs-1.

**Table S1.** Chromaticity coordinates (CIE) and peak statistics at selected pressures for solid CPDs-1.

| Pressure (GPa) | CIE (x) | CIE (y) | Peak (nm) |
|----------------|---------|---------|-----------|
| 0              | 0.5481  | 0.3932  | 593       |
| 0.2            | 0.5215  | 0.4041  | 596       |
| 0.8            | 0.5201  | 0.4007  | 599       |
| 3.7            | 0.504   | 0.4038  | 603       |
| 7.5            | 0.4962  | 0.4081  | 609       |
| 10.7           | 0.4924  | 0.4110  | 612       |
| 13.5           | 0.4909  | 0.4134  | 614       |
| 17.8           | 0.4865  | 0.4136  | 623       |

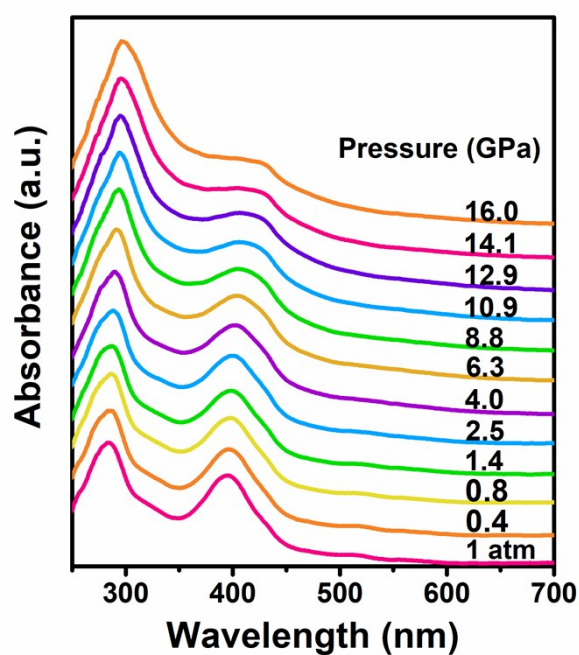

**Fig. S7** Absorption spectra against pressures for CPDs-1 in situ measured in a DAC apparatus.

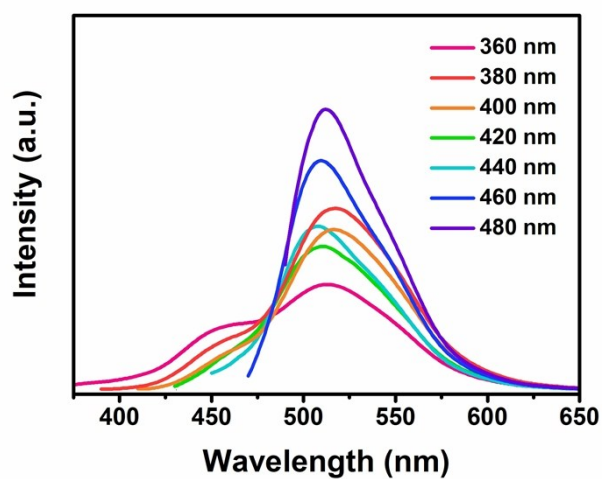

**Fig. S8** PL spectra of CPDs-2 under different excitation wavelengths under ordinary pressure.

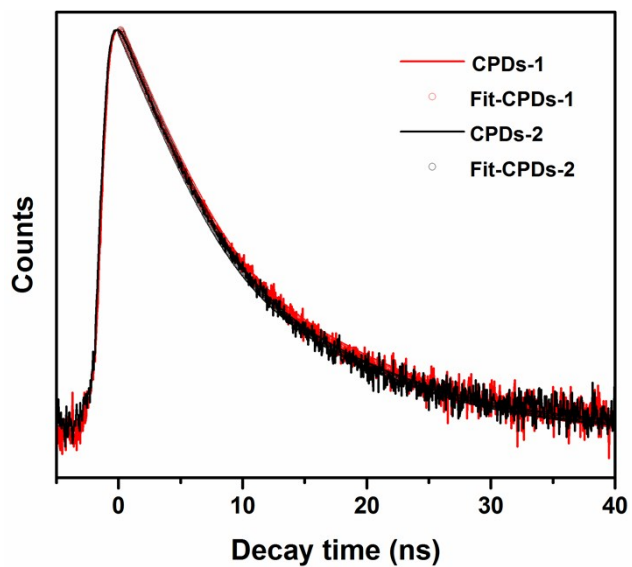

**Fig. S9.** Time-resolved phosphorescence spectrum of CPDs-1 and CPDs-2.

**Table S2.** Fluorescence Lifetime of CPDs-1 and CPDs-2.

| samples | $\lambda_{\text{ex}}$<br>(nm) | $\lambda_{\text{detect}}$<br>(nm) | $\tau_1$<br>(ns) | $A_1$ (%) | $\tau_2$<br>(ns) | $A_2$ (%) | $\tau_{\text{avg}}$<br>(ns) |
|---------|-------------------------------|-----------------------------------|------------------|-----------|------------------|-----------|-----------------------------|
| CPDs-1  | 375                           | 530                               | 2.18             | 82.84     | 8.11             | 17.16     | 3.19                        |
| CPDs-2  | 375                           | 530                               | 2.17             | 84.46     | 7.81             | 15.54     | 3.05                        |

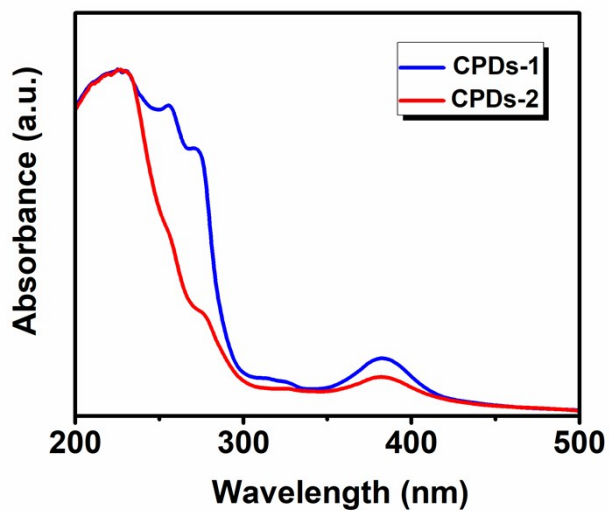

**Fig. S10** The absorption spectra of CPDs-2 and CPDs-1.

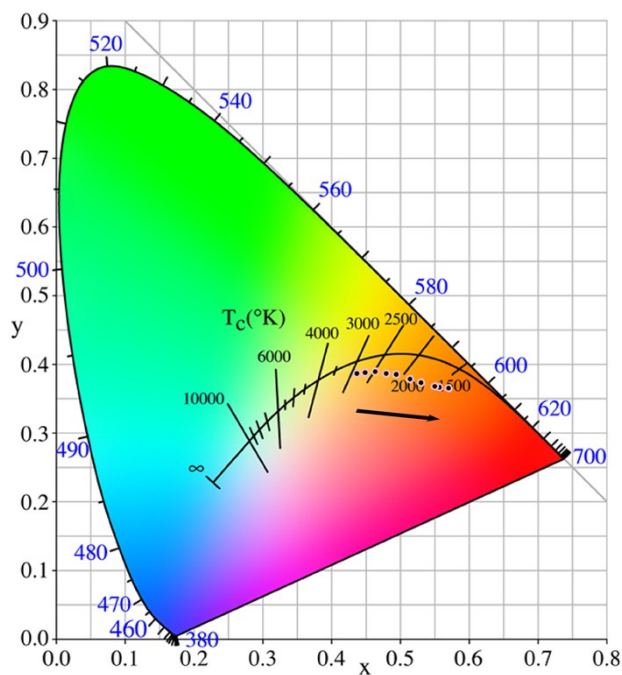

**Fig. S11** Pressure-dependent chromaticity coordinates (CIE) of PVA/CPDs-1.

**Table S3** Chromaticity coordinates (CIE) and peak statistics at selected pressures for PVA/CPDs-1.

| Pressure (GPa) | CIE (x) | CIE (y) | Peak (nm) |
|----------------|---------|---------|-----------|
| 0              | 0.5703  | 0.3660  | 592       |
| 1.0            | 0.5573  | 0.3663  | 596       |
| 1.7            | 0.5503  | 0.3683  | 598       |
| 3.2            | 0.5308  | 0.3738  | 602       |
| 5.9            | 0.5152  | 0.3791  | 609       |
| 8.8            | 0.4949  | 0.3850  | 610       |
| 11.3           | 0.4802  | 0.3871  | 613       |
| 13.9           | 0.4639  | 0.3894  | 616       |
| 17.2           | 0.4488  | 0.3886  | 611       |
| 20.1           | 0.4372  | 0.3864  | 608       |



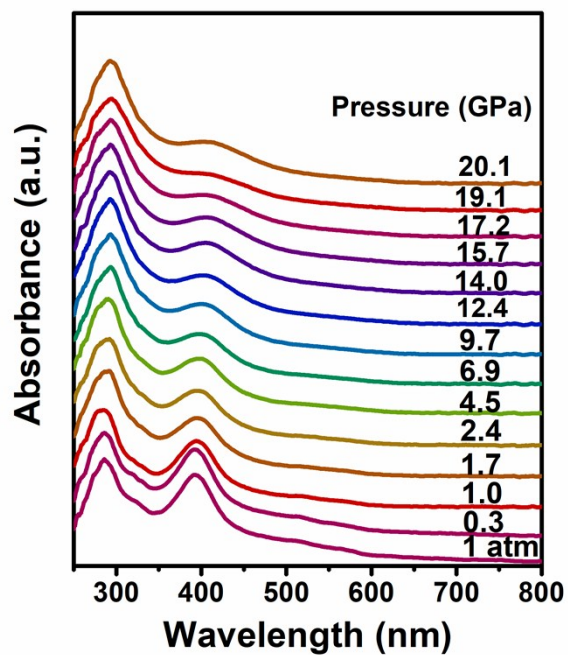

**Fig. S12** Absorption spectra against pressures for PVA/CPDs-1 in situ measured in a DAC apparatus

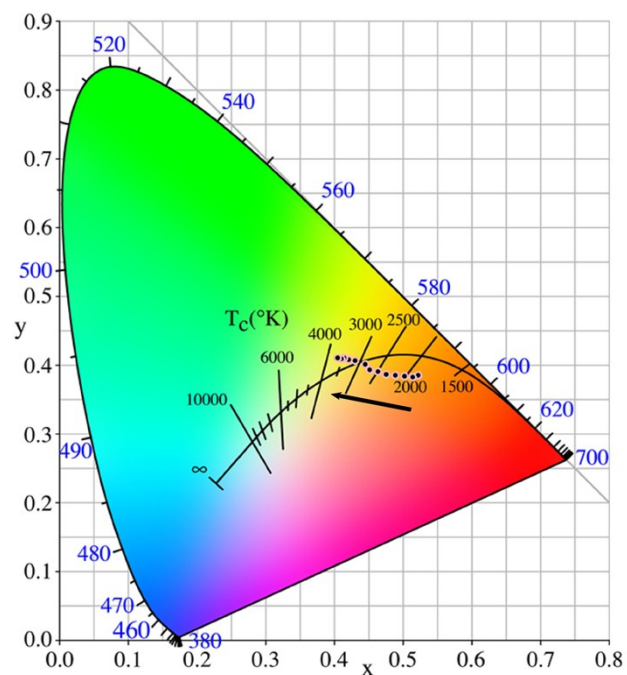

**Fig. S13** Pressure-dependent chromaticity coordinates (CIE) of PVA/CPDs-2.

**Table S4** Chromaticity coordinates (CIE) and peak statistics at selected pressures for PVA/CPDs-2.

| Pressure (GPa) | CIE (x) | CIE (y) | Peak (nm) |
|----------------|---------|---------|-----------|
| 0              | 0.5226  | 0.3858  | 587       |
| 0.6            | 0.5153  | 0.3832  | 589       |
| 1.4            | 0.5026  | 0.3845  | 590       |
| 2.8            | 0.4893  | 0.3856  | 591       |
| 4.3            | 0.4759  | 0.3873  | 593       |
| 6.6            | 0.4643  | 0.3906  | 592       |
| 7.5            | 0.4521  | 0.3932  | 591       |
| 10.7           | 0.4450  | 0.4019  | 589       |
| 12.6           | 0.4309  | 0.4064  | 586       |
| 14.6           | 0.4219  | 0.4081  | 567       |
| 16.9           | 0.4148  | 0.4105  | 564       |
| 18.1           | 0.4106  | 0.4097  | 560       |
| 20.3           | 0.4053  | 0.4104  | 556       |

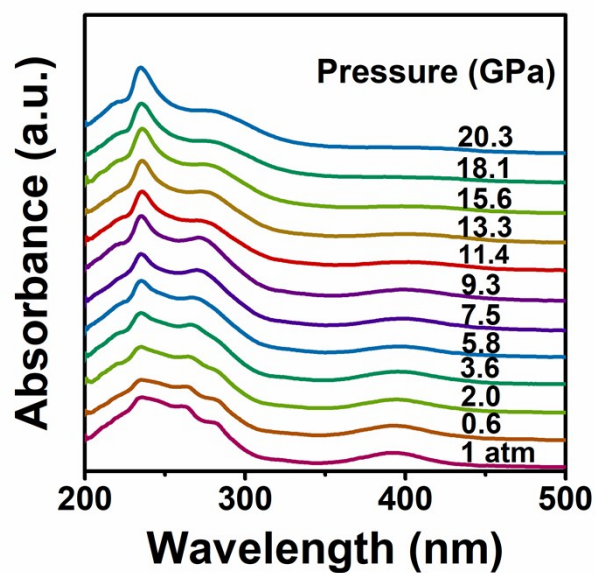

**Fig. S14** Absorption spectra against pressures for PVA/CPDs-2 in situ measured in a DAC apparatus.

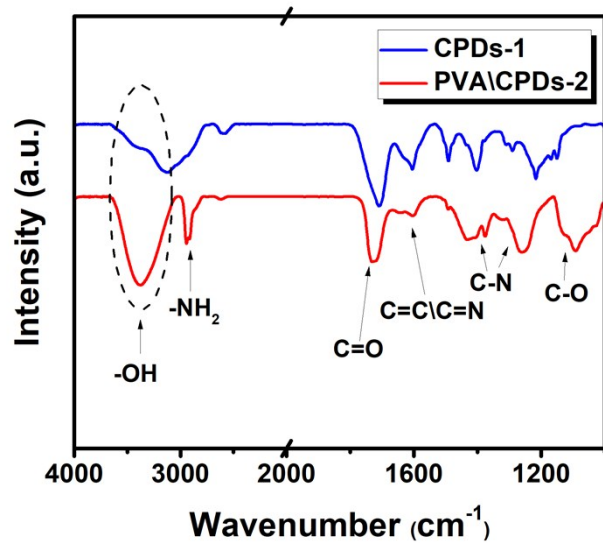

**Fig. S15** FT-IR spectra of CPDs-1 and PVA\CPDs-2.

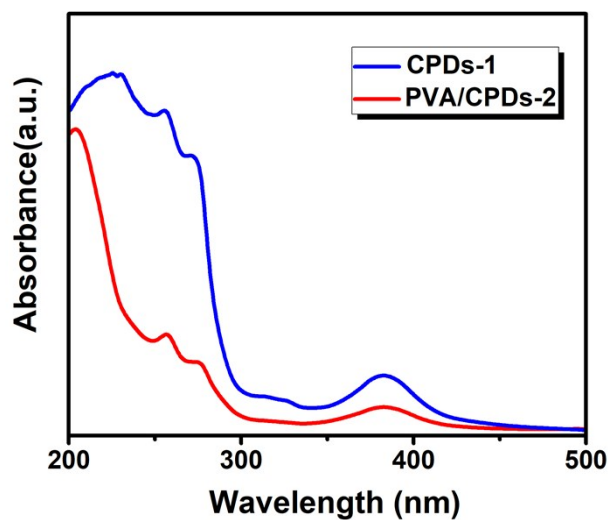

**Fig. S16** Absorption spectra of PVA/CDs-2 and CPDs-1.
